# Supplementary material
Source: publisher site journal article supplement (https://www.spandidos-publications.com/4473/downloadSupplementary)

Figure S1. miR-124 and lnc-NEAT1 expression. (A) miR-124 and (B) lnc-NEAT1 expression in the NC-inhibitor group and miR-124-inhibitor groups was measured by reverse transcription-quantitative PCR. miR, microRNA; lnc-NEAT1, long non-coding RNA nuclear enriched abundant transcript 1; NC, negative control.

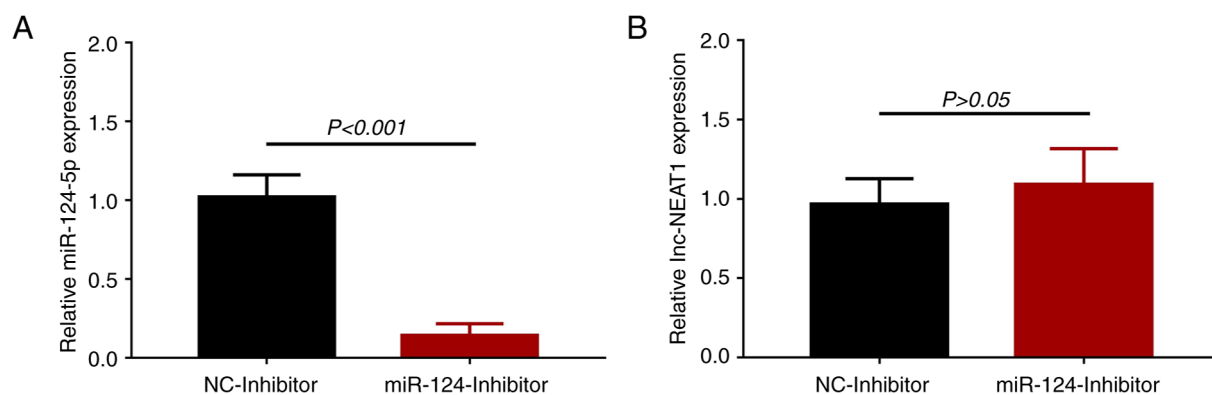

Supplement: Supplementary file 1 [file downloadSupplementary]
